# Supplementary material
Source: publisher site journal article supplement (https://www.dovepress.com/article/592770)
Supplement: Supplementary file 1 [file Supplementary%20Material%20202603.docx]

**
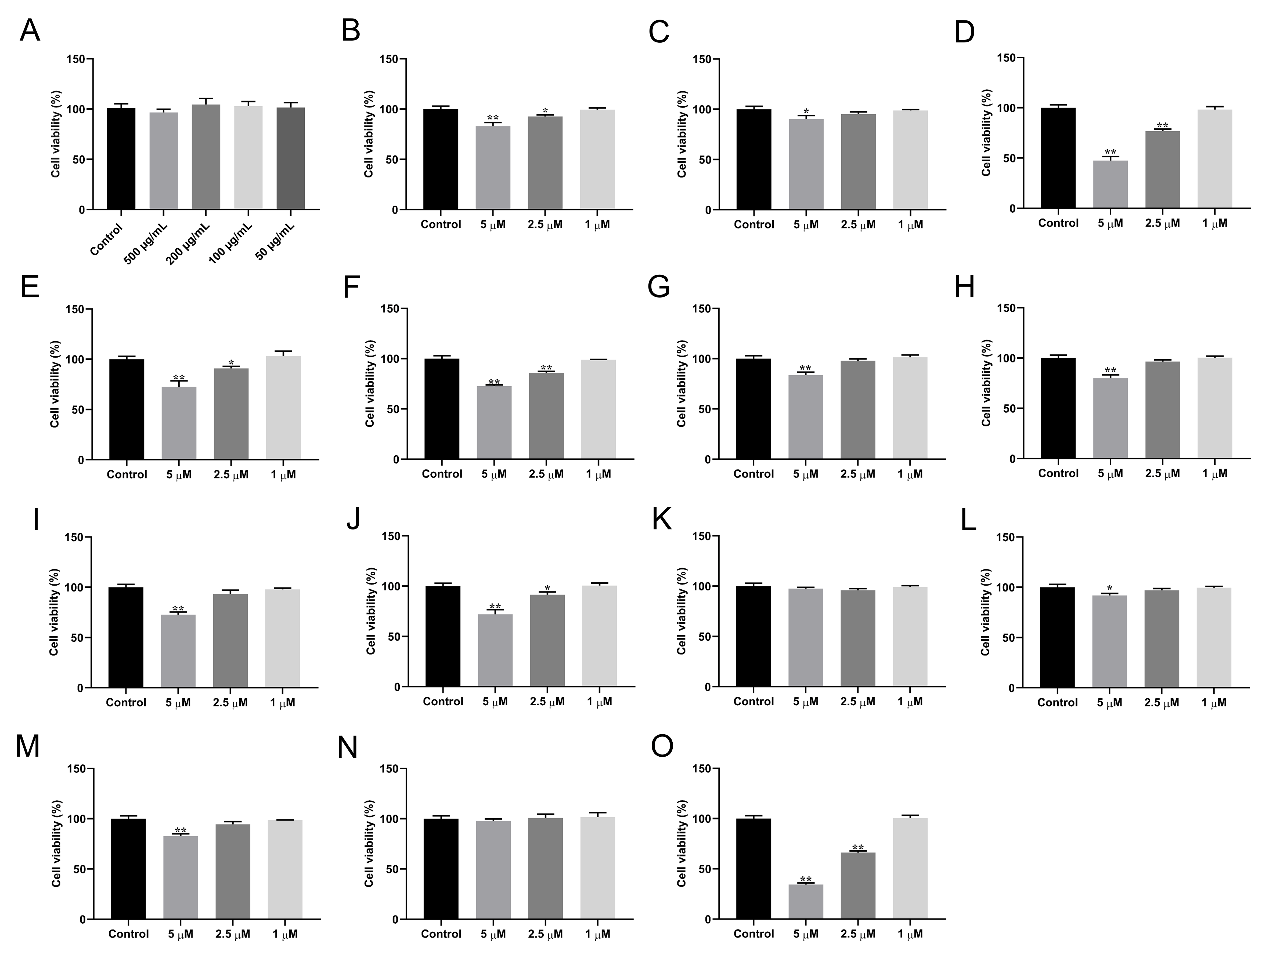
**

**Supplementary Fig. S1.** The viability of MRC-5 cells treated with different drug concentrations was assessed using the CCK-8 assay. (A) Qingfei Huoxue decoction. (B) Loganin. (C) Phillyrin. (D) Baicalein. (E) Baicalin. (F) Wogonin. (G) Wogonoside. (H) Oroxylin A. (I) Peimine. (J) Peiminine. (K) Tanshinone IIA. (L) Nobiletin. (M) Paeoniflorin. (N) Albiflorin. (O) Praeruptorin A.

**
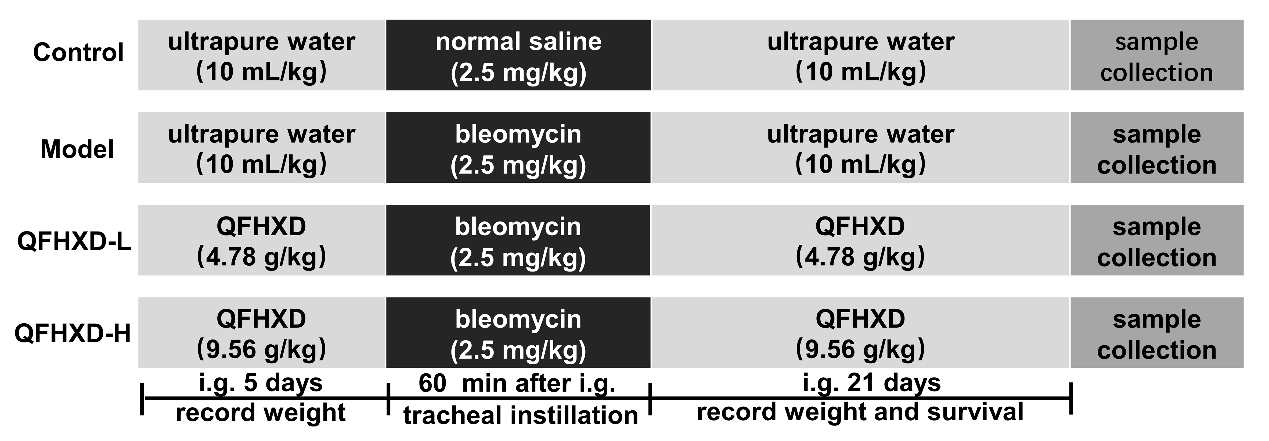
**

**Supplementary Fig. S2.** The schematic diagram of experimental design.

**
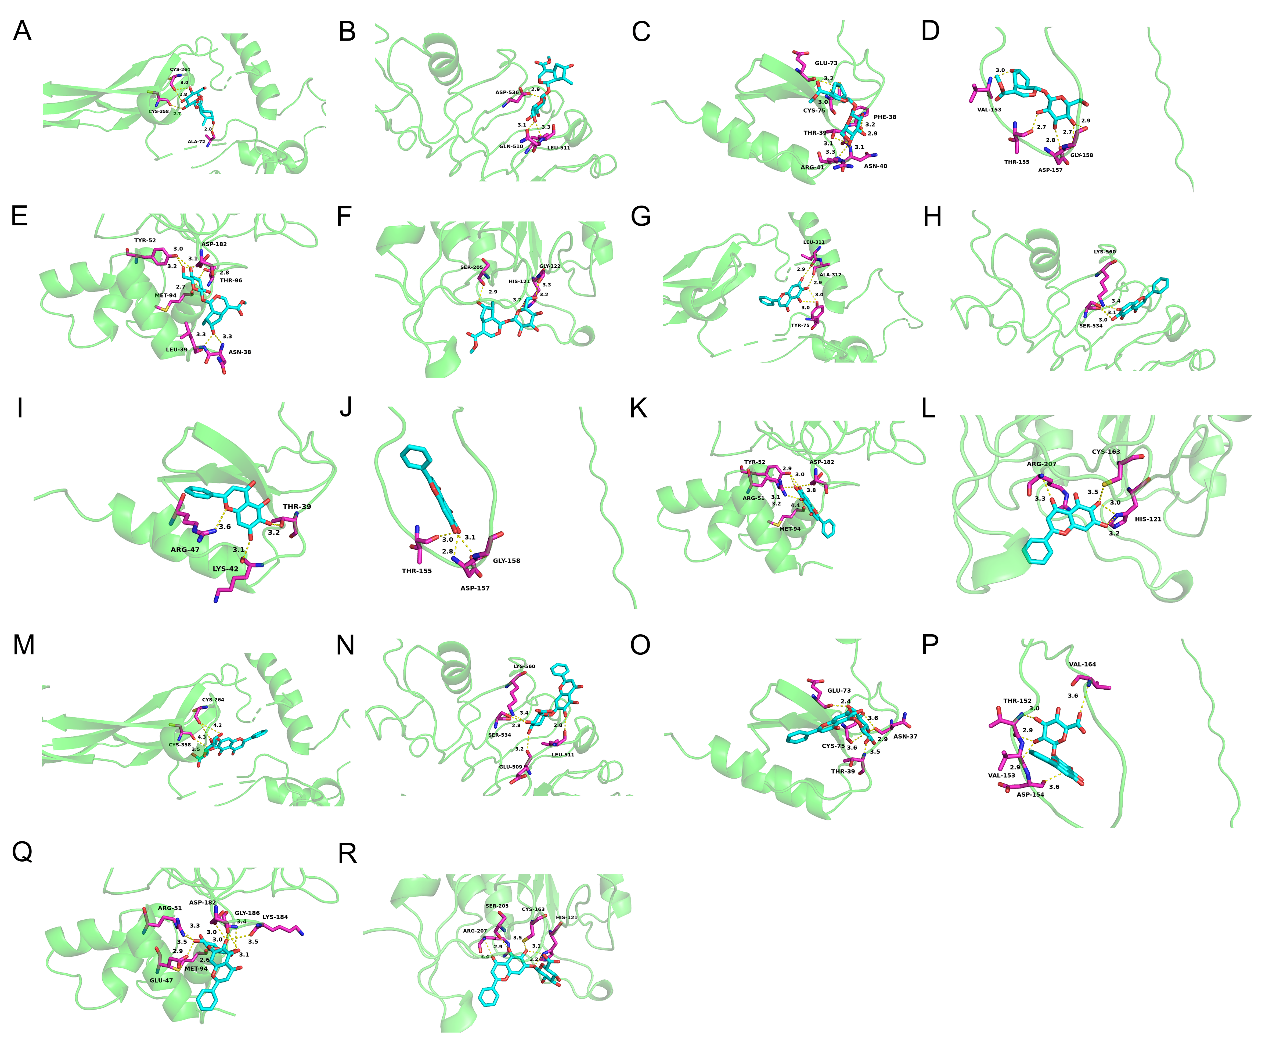
**

**Supplementary Fig. S3.** Molecular docking models of anti-PF active compounds and PF-related key targets. (A) Loganin-TGF-β1. (B) Loganin-TLR4. (C) Loganin-CCL2. (D) Loganin-SPP1. (E) Loganin-MMP9. (F) Loganin-Caspase-3. (G) Baicalein-TGF-β1. (H) Baicalein-TLR4. (I) Baicalein-CCL2. (J) Baicalein-SPP1. (K) Baicalein-MMP9. (L) Baicalein-Caspase-3. (M) Baicalin-TGF-β1. (N) Baicalin-TLR4. (O) Baicalin-CCL2. (P) Baicalin-SPP1. (Q) Baicalin-MMP9. (R) Baicalin-Caspase-3.


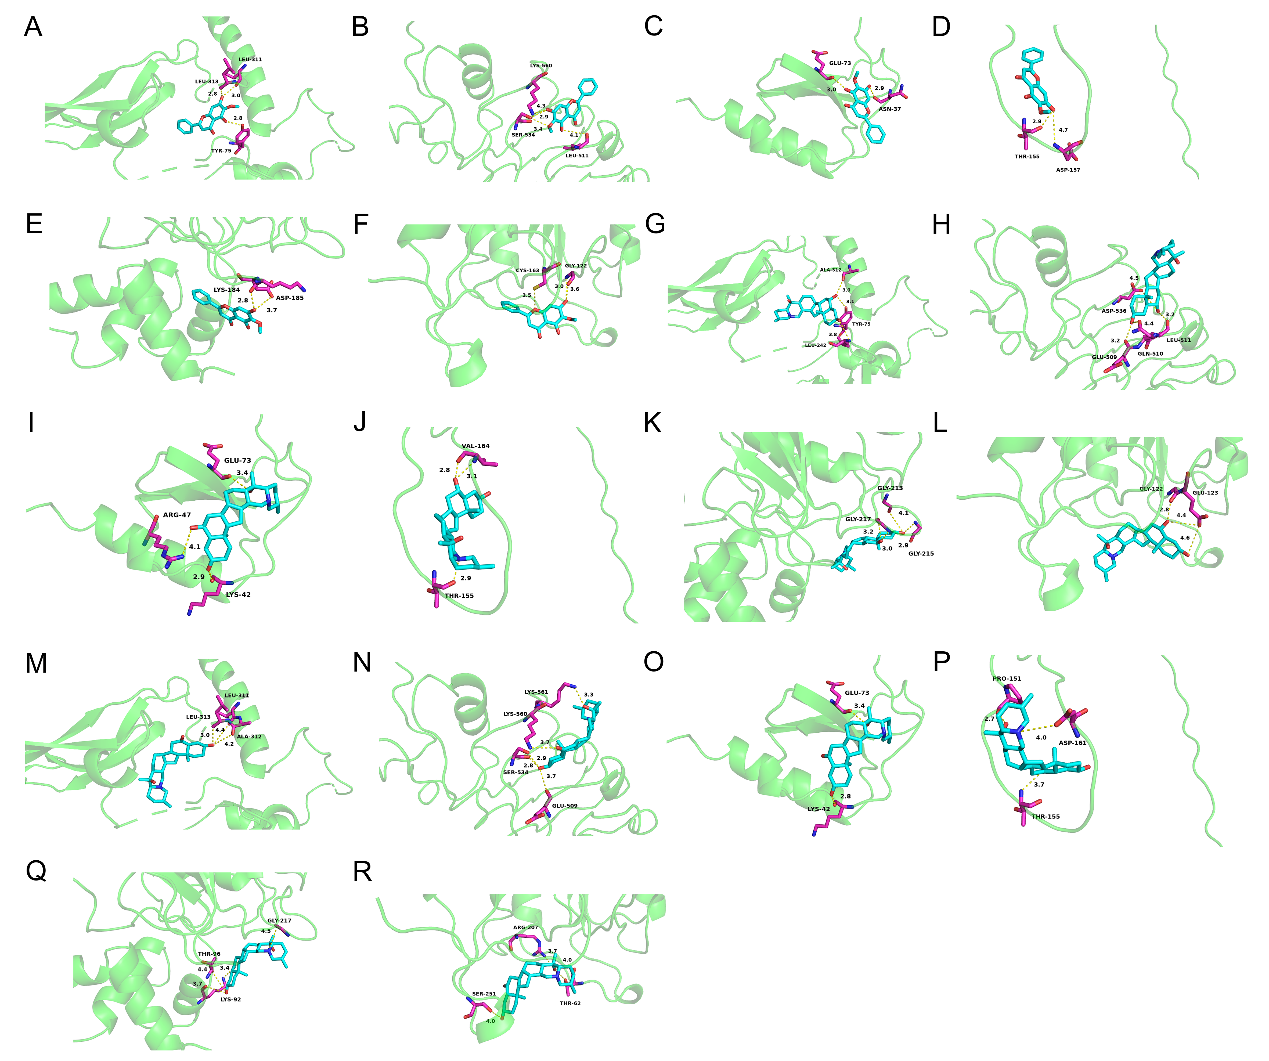


**Supplementary Fig. S4.** Molecular docking models of anti-PF active compounds and PF-related key targets. (A) Oroxylin A-TGF-β1. (B) Oroxylin A-TLR4. (C) Oroxylin A-CCL2. (D) Oroxylin A-SPP1. (E) Oroxylin A-MMP9. (F) Oroxylin A-Caspase-3. (G) Peimine-TGF-β1. (H) Peimine-TLR4. (I) Peimine-CCL2. (J) Peimine-SPP1. (K) Peimine-MMP9. (L) Peimine-Caspase-3. (M) Peiminine-TGF-β1. (N) Peiminine-TLR4. (O) Peiminine-CCL2. (P) Peiminine-SPP1. (Q) Peiminine-MMP9. (R) Peiminine-Caspase-3.


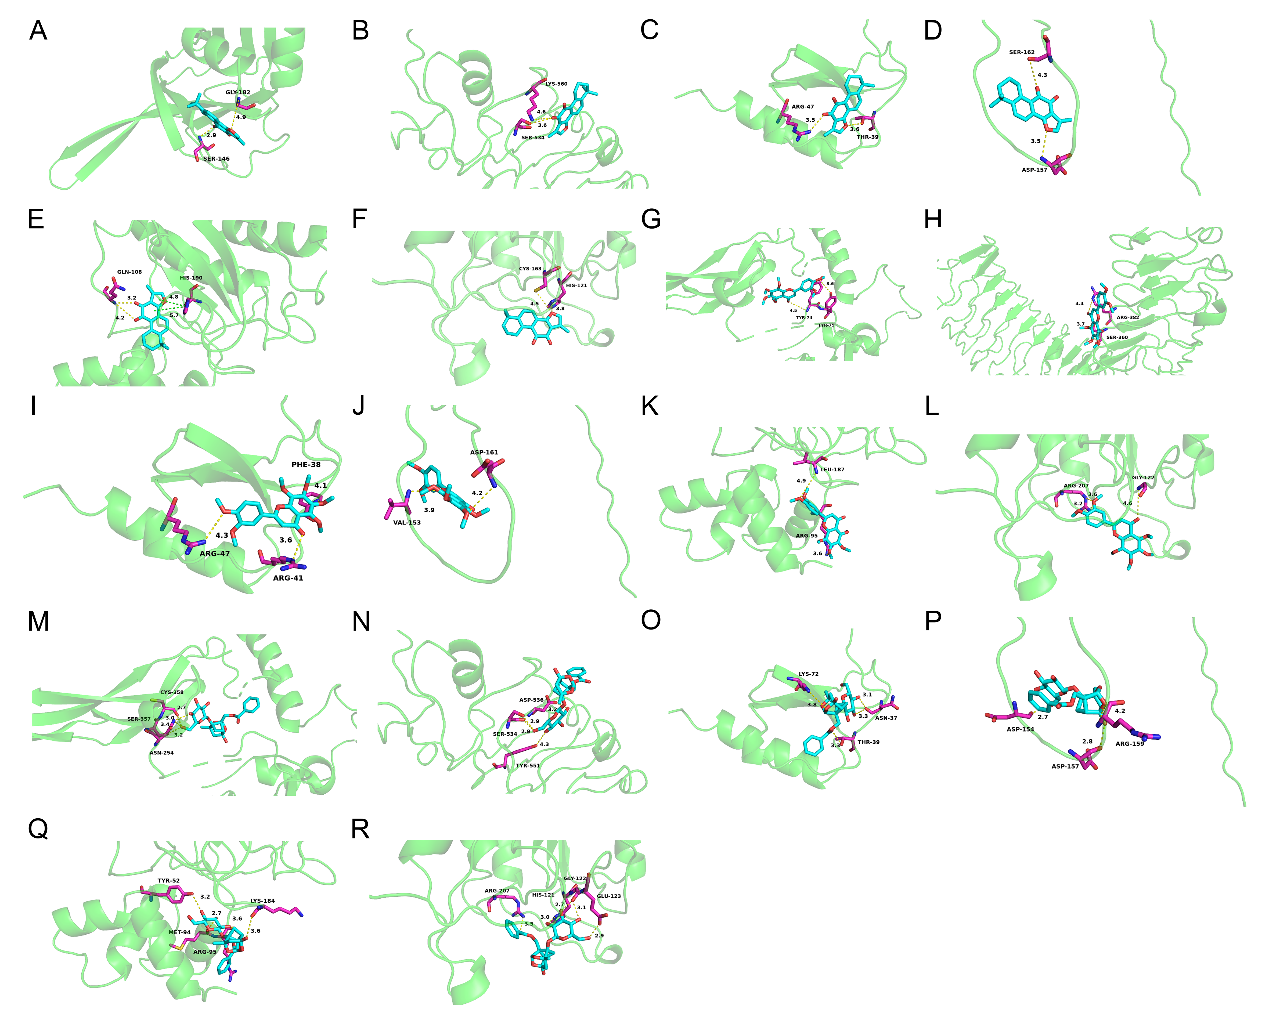


**Supplementary Fig. S5.** Molecular docking models of anti-PF active compounds and PF-related key targets. (A) Tanshinone IIA-TGF-β1. (B) Tanshinone IIA-TLR4. (C) Tanshinone IIA-CCL2. (D) Tanshinone IIA-SPP1. (E) Tanshinone IIA-MMP9. (F) Tanshinone IIA-Caspase-3. (G) Nobiletin-TGF-β1. (H) Nobiletin-TLR4. (I) Nobiletin-CCL2. (J) Nobiletin-SPP1. (K) Nobiletin-MMP9. (L) Nobiletin-Caspase-3. (M) Paeoniflorin-TGF-β1. (N) Paeoniflorin-TLR4. (O) Paeoniflorin-CCL2. (P) Paeoniflorin-SPP1. (Q) Paeoniflorin-MMP9. (R) Paeoniflorin-Caspase-3.

**Supplementary Table S1.** The details of primer sequences for RT-qPCR.

| **Primer name** | **Forward primer (5′-3′)** | **Reverse primer (5′-3′)** |
| --- | --- | --- |
| qMouse Casp3 | ATGGAGAACAACAAAACCTCAGT | TTGCTCCCATGTATGGTCTTTAC |
| qMouse Bax | TGAAGACAGGGGCCTTTTTG | AATTCGCCGGAGACACTCG |
| qMouse Bcl2 | ATGCCTTTGTGGAACTATATGGC | GGTATGCACCCAGAGTGATGC |
| qMouse Tlr2 | GCAAACGCTGTTCTGCTCAG | AGGCGTCTCCCTCTATTGTATT |
| qMouse Tlr4 | ATGGCATGGCTTACACCACC | GAGGCCAATTTTGTCTCCACA |
| qMouse Nfkb1 | ATGGCAGACGATGATCCCTAC | TGTTGACAGTGGTATTTCTGGTG |
| qMouse Rela | AGGCTTCTGGGCCTTATGTG | TGCTTCTCTCGCCAGGAATAC |
| qMouse Tnf | CCCTCACACTCAGATCATCTTCT | GCTACGACGTGGGCTACAG |
| qMouse Il6 | TAGTCCTTCCTACCCCAATTTCC | TTGGTCCTTAGCCACTCCTTC |
| qMouse Il1b | GAAATGCCACCTTTTGACAGTG | TGGATGCTCTCATCAGGACAG |
| qMouse Mmp9 | CACGGCAACGGAGAAGGCAAAC | CCTGGTCATAGTTGGCTGTGGTGGC |
| qMouse Mmp13 | CTTCTTCTTGTTGAGCTGGACTC | CTGTGGAGGTCACTGTAGACT |
| qMouse Mmp14 | CAGTATGGCTACCTACCTCCAG | GCCTTGCCTGTCACTTGTAAA |
| qMouse Ccl2 | TTAAAAACCTGGATCGGAACCAA | GCATTAGCTTCAGATTTACGGGT |
| qMouse Tgfb1 | CTCCCGTGGCTTCTAGTGC | GCCTTAGTTTGGACAGGATCTG |
| qMouse Fn1 | GCTCAGCAAATCGTGCAGC | CTAGGTAGGTCCGTTCCCACT |
| qMouse Spp1 | AGCAAGAAACTCTTCCAAGCAA | GTGAGATTCGTCAGATTCATCCG |
| qMouse Col1a1 | GCTCCTCTTAGGGGCCACT | CCACGTCTCACCATTGGGG |
| qMouse Gapdh | TGGTGAAGCAGGCATCTGAG | TGCTGTTGAAGTCGCAGGAG |

**Supplementary Table S2.** The information of 323 overlapping targets in the component-target-disease network.

| **The information of 323 overlapping genes** | | | | | | | | | |
| --- | --- | --- | --- | --- | --- | --- | --- | --- | --- |
| FSTL1 | FOXP3 | CCL17 | CASP1 | CTSD | UCP2 | ADAMTS1 | CXCL9 | CCL5 | GAPDH |
| MMP2 | DPP4 | FN1 | GLI1 | VEGFA | HSP90AA1 | MMP14 | CAV1 | TP53 | TLR2 |
| PINK1 | CCNE1 | ABCB1 | SPP1 | STAT6 | CASP3 | PIK3CG | BCL2L1 | STK11 | CDKN2A |
| XDH | C3 | NFE2L2 | F2 | PIK3CD | PARP1 | MDM2 | TNFRSF1B | IL33 | CASP4 |
| EDN1 | FAS | NR3C1 | APAF1 | SLC7A11 | CD14 | TNFSF11 | MAPK3 | TLR9 | CASP2 |
| BID | PON1 | IL17A | WNT5A | SCARB1 | ROCK1 | CXCL2 | HDAC2 | PDK1 | TFPI2 |
| CXCR4 | F2RL1 | ECE1 | TRPA1 | IL3 | FASLG | EGFR | EIF4EBP1 | CASP9 | ERN1 |
| IRAK1 | BDNF | MTOR | PTGS2 | TGFB1 | COL3A1 | IKBKB | CXCL1 | CDKN1A | JUN |
| IGF1 | CDK1 | PPARGC1A | ARG1 | MYC | PRKAA2 | NQO1 | GUSB | CAT | MMP10 |
| PTEN | PTK2 | BNIP3 | PCK1 | SOCS3 | CD163 | SP1 | TERT | JAK1 | AR |
| CYCS | ABCA1 | SNAI1 | NCF1 | KEAP1 | WNT1 | SOD1 | HIF1A | AKT1 | TWIST1 |
| MMP7 | CHEK1 | MAPK14 | AGER | CCNA2 | CCL11 | PIK3CA | RELA | PIK3R1 | NOTCH1 |
| NOS2 | GCLM | AOC3 | CTNNB1 | TIMP1 | KDR | IL2 | SOCS1 | PRKAB1 | BAX |
| MMP13 | ULK1 | CCN2 | CYP2C9 | MGMT | PGAM5 | FADD | NOS3 | ATG12 | COL1A2 |
| CCNB1 | BCL2 | FTH1 | NOX4 | IL13 | HMOX1 | CREB1 | RB1 | NFKB1 | PRKCA |
| SOD2 | PIK3CB | CTSB | BAD | ACHE | MYD88 | SMAD1 | CFTR | SIRT1 | HGF |
| BAK1 | LBP | TNF | IL18 | GSK3B | SMAD2 | DDIT3 | HSF1 | TIMP2 | CYP3A4 |
| MET | EDNRA | RAF1 | CCND1 | ATF4 | BGLAP | LGALS3 | SRC | ITGB3 | IL7 |
| NGF | CXCR2 | GDF2 | CTSK | FOXO1 | MMP3 | CDH1 | HEY1 | IL1B | SCN5A |
| ALOX5 | MFN2 | IL23A | CCL4 | MCL1 | TRAF6 | IFNG | CEBPA | CHRM3 | SOX2 |
| NLRP3 | CYP1A1 | CCR2 | BMP2 | CCL2 | LRP6 | FOS | CDK2 | NFKBIA | CYP1B1 |
| FASN | CASP8 | PLA2G4A | ESR1 | TXNIP | PPARA | HSPA5 | NFKBIB | ACTA2 | PRSS1 |
| CCL22 | IL5 | SMAD7 | SST | MMP1 | RACK1 | IL4 | RUNX2 | BECN1 | ACKR3 |
| RUNX3 | FGF1 | SGK1 | BMP4 | ADA | TFAM | FGF2 | DKK1 | CPT1A | HMGB1 |
| PRKCB | PPARG | VIM | GPX4 | STAT1 | FAP | CXCL12 | SIRT3 | TERF1 | MMP9 |
| MAP3K5 | HSPA4 | IRF7 | CDK4 | GCLC | CYP1A2 | ATF2 | AQP1 | PTGS1 | ADIPOQ |
| NOS1 | RHOA | PCNA | ACE2 | EIF2AK3 | MMP8 | COL2A1 | TLR4 | SREBF1 |  |
| ROCK2 | PRKCD | MAP1LC3B | CASP7 | IL6 | BMPR2 | HK2 | AQP5 | NOD2 |  |
| ABCG1 | CALCA | ATG5 | TJP1 | MMP12 | AHSA1 | CX3CL1 | CXCL10 | NR1I2 |  |
| SQSTM1 | MAPT | LDHA | HRAS | CCL24 | S100A4 | MAPK8 | ATF6 | APOA1 |  |
| COL1A1 | PRKAA1 | JAK2 | ADRB2 | SLC2A1 | IL10 | MFN1 | PLG | FOXO3 |  |
| MTHFR | GSTP1 | CHUK | SMAD4 | CCR7 | MAPK1 | F10 | SERPINE1 | CX3CR1 |  |
| SMAD3 | CXCL8 | STAT3 | POR | TRPV1 | LOXL2 | ICAM1 | VCAM1 | IFNB1 |  |

**Supplementary Table S3.** The association between 46 components and 323 disease-related targets in the component-target-disease network.

| Components | Disease-related targets |
| --- | --- |
| Oroxylin A | IL17A, MMP2, TLR4, MTOR, CXCL10, ATF6, PPARGC1A, MAPK14, TP53, PTEN, HMOX1, NOS2, TNF, MMP13, CCNB1, SOD2, SMAD2, CASP9, MMP3, CDKN1A, NLRP3, CYP1A2, MAP1LC3B, ATG5, AKT1, IL10, STAT3, MAPK1, COL1A1, SMAD3, PTGS2, FOXP3, ATG12, SIRT1, NQO1, DPP4, TIMP2, CYP2C9, IL1B, BAD, IL18, IL2, FAS, ESR1, CDK1, NFKBIA, BECN1, PTGS1, IL4, BCL2, CASP7, FGF2, CXCL12, ADRB2, VEGFA, TGFB1, MAPK8, MFN2, MAPK3, CCNA2, CASP8, AR, IL5, IL13, TWIST1, CXCL1, NOTCH1, BAX, PPARG, GSK3B, MCL1, CCL2, HIF1A, RELA, IL6, SCN5A, CXCL8, PRSS1, ACKR3, CDK2, UCP2, CASP3, NFE2L2, MMP9, PARP1, SIRT3 |
| Wogonin | IL17A, MMP2, TLR4, BID, MAPK14, TP53, HMOX1, NOS2, TNF, MMP13, SOD2, MYD88, CASP9, MMP3, CDKN1A, PPARA, SGK1, JAK1, AKT1, CHUK, IL10, STAT3, MAPK1, SMAD3, PTGS2, MDM2, NFKB1, SIRT1, IKBKB, NQO1, IL1B, NOX4, BECN1, PTGS1, IL4, BCL2, COL2A1, VEGFA, TGFB1, CASP4, MAPK8, ICAM1, TNFRSF1B, SOCS3, KEAP1, MAPK3, CASP8, AR, IL5, IL13, BAX, PPARG, GSK3B, FOXO1, RHOA, MCL1, CCL2, HIF1A, RELA, MMP1, STAT1, PRKAA1, IL6, SCN5A, RB1, CXCL8, SLC2A1, CDK2, FN1, CASP3, NFE2L2, MMP9, PARP1, ADIPOQ |
| Wogonoside | MMP2, TLR4, MTOR, IRAK1, MAPK14, CCL11, TP53, HMOX1, NOS2, TNF, MMP13, MYD88, CASP9, MMP3, TRAF6, CDKN1A, VIM, NLRP3, PCNA, AKT1, STAT3, MAPK1, GLI1, MMP14, NFKB1, SIRT1, NQO1, IL1B, CCND1, CDK4, NFKBIA, IL4, BCL2, TJP1, VEGFA, SLC7A11, TGFB1, MAPK8, F10, MYC, ERN1, JUN, MAPK3, CCNA2, IL5, IL13, TWIST1, BAX, CCL2, HIF1A, RELA, SOCS1, IL6, SOX2, CCL24, CDK2, RUNX2, CASP3, NFE2L2, MMP9, SIRT3 |
| Baicalein | IL17A, MMP2, TLR4, MTOR, CXCL10, PPARGC1A, COL3A1, BID, SNAI1, PRKAA2, MAPK14, CCN2, TP53, HMOX1, NOS2, TNF, SOD2, MYD88, SMAD2, CASP9, BAK1, CDKN1A, VIM, NLRP3, MAP1LC3B, BMPR2, RUNX3, AKT1, JAK2, STAT3, CASP1, MAPK1, COL1A1, APAF1, SMAD3, PTGS2, CXCL2, NFKB1, SIRT1, DPP4, TIMP2, SP1, IL1B, BAD, IL18, CCL4, IL2, FAS, CDK1, NFKBIA, CDH1, ACTA2, BECN1, PTGS1, IL4, ULK1, BCL2, CASP7, TJP1, FOXO3, SMAD4, VEGFA, CDKN2A, TGFB1, MAPK8, MFN1, CASP2, ICAM1, MFN2, CXCL9, CYP1A1, KEAP1, MAPK3, MMP10, TIMP1, CASP8, AR, IL5, EIF4EBP1, CXCL1, BAX, PPARG, GSK3B, COL1A2, MCL1, HIF1A, RELA, TXNIP, MMP1, STAT1, PRKAA1, IL6, IL7, MMP12, CXCL8, FN1, NFKBIB, CASP3, HMGB1, NFE2L2, MMP9, PARP1, SIRT3 |
| Baicalin | IL17A, FSTL1, MMP2, TLR4, ROCK1, MTOR, PPARGC1A, SERPINE1, CXCR4, MAPK14, VCAM1, CCN2, HMOX1, NOS2, TNF, MMP13, GDF2, PDK1, IL23A, MYD88, SMAD2, CASP9, MMP3, TRAF6, PPARA, SMAD7, NLRP3, JAK1, IRF7, PCNA, BMPR2, AKT1, JAK2, IL10, STAT3, CASP1, MAPK1, COL1A1, ADAMTS1, WNT5A, SMAD3, FOXP3, AGER, CXCL2, SIRT1, IKBKB, NQO1, IL1B, FAS, SMAD1, BMP4, GPX4, CDK4, NFKBIA, IFNG, BECN1, IL4, BCL2, CX3CR1, CXCL12, TLR2, VEGFA, CDKN2A, TGFB1, CX3CL1, MAPK8, F10, ICAM1, JUN, KEAP1, MAPK3, TIMP1, HDAC2, IL13, CXCL1, BAX, PPARG, GSK3B, FOXO1, CCL2, HIF1A, RELA, MMP1, STAT1, EIF2AK3, NOS3, PRKAA1, IL6, CCR7, CDK2, DKK1, CASP3, HMGB1, NFE2L2, MMP9, PARP1 |
| Phillyrin | MMP2, TLR4, MTOR, MAPK14, KDR, FTH1, HMOX1, NOS2, STK11, TNF, PDK1, MYD88, SMAD2, TRAF6, NLRP3, MAP1LC3B, AKT1, JAK2, STAT3, CASP1, MAPK1, F2, SMAD3, FOXP3, EGFR, NQO1, IL1B, SOD1, IL2, FAS, ESR1, FOS, BECN1, BCL2, TLR2, VEGFA, SLC7A11, TGFB1, MAPK8, CXCR2, MAPK3, BAX, PPARG, GSK3B, CCL2, HIF1A, RELA, NOS3, PRKAA1, IL6, CASP3, NFE2L2, MMP9, PARP1 |
| Paeoniflorin | IL17A, TLR4, MTOR, COL3A1, PRKAA2, MAPK14, WNT1, CCL5, HMOX1, STK11, TNF, SMAD2, CASP9, CDKN1A, SMAD7, NLRP3, BMPR2, AKT1, MAP3K5, S100A4, IL10, MAPK1, COL1A1, SMAD3, PRKAB1, NFKB1, NQO1, IL1B, SOD1, FAS, BECN1, IL4, BCL2, TJP1, CXCL12, LBP, SMAD4, TGFB1, MAPK8, ICAM1, SOCS3, KEAP1, MAPK3, TIMP1, IL5, IL13, BAX, HSPA4, RELA, MMP1, NOS3, PRKAA1, IL6, MMP12, CXCL8, CCL17, CASP3, NFE2L2, MMP9, CD14 |
| Neocryptotanshinone | PPARGC1A, KDR, NOS2, TNF, CASP9, PPARA, TFAM, STAT3, MAPK1, PTGS2, NFKB1, IL1B, CPT1A, PTGS1, BCL2, MAPK3, NOTCH1, BAX, PPARG, RELA, IL6, CASP3, NFE2L2 |
| Loganin | TLR4, PINK1, MTOR, CXCR4, MAPK14, HMOX1, TNF, MMP13, MYD88, SMAD2, CCR2, MMP3, TRAF6, NLRP3, AKT1, JAK2, STAT3, CASP1, MAPK1, F2, AGER, SIRT1, DPP4, IL1B, NOX4, IL18, ESR1, CXCL12, ICAM1, MAPK3, AR, FOXO1, CCL2, RELA, TXNIP, IL6, CASP3, NFE2L2 |
| Secoxyloganin | DPP4, TLR4, MAPK8, NOS2, TNF, IL1B, BCL2, BAX, CASP3, TGFB1, SMAD2, SMAD3, MMP1, MMP2, RELA |
| Secologanic acid | AKT1, PIK3R1, MAPK1, LGALS3, PRSS1, CDK2 |
| Secologanoside | PTGS2 |
| Isoquercitrin | MMP2, TLR4, MTOR, ATF6, MAPK14, TP53, HMOX1, NOS2, TNF, SOD2, MYD88, CASP9, MMP3, NLRP3, AKT1, JAK2, STAT3, CASP1, MAPK1, ARG1, IL1B, BMP2, FAS, LGALS3, SREBF1, BCL2, TGFB1, F10, CYP1A1, JUN, KEAP1, MAPK3, BAX, GSK3B, MCL1, CCL2, HIF1A, RELA, TXNIP, MMP1, PRKAA1, IL6, CYP1B1, HSF1, RUNX2, CASP3, HMGB1, NFE2L2, MMP9 |
| Oroxyloside | CASP3, CASP9, BAX, BCL2, PARP1, MAPK8, IL1B, IL6, TNF, PPARG, RELA, AKT1, KDR, APAF1, CDK2, TP53, CDKN1A, HSPA5, EIF2AK3, ATF4, DDIT3 |
| Isoverticine | AR, ESR1 |
| Peiminine | AR, COL1A1, PPARG, CEBPA, RELA, MAPK1, MAPK3, MAPK14, FOS, CTSK, MAPK8, BAX, BCL2, IL1B, IL6, TNF, AKT1, CDK2, CASP3, CASP9, BECN1, JUN, MMP2, MMP9, NFE2L2, HMOX1, NQO1, IL4, CCN2, FASLG, TGFB1, PARP1, CASP8, PINK1, MMP13, EGFR, PTK2, IL13, TLR4, NOS2, MYD88, CHUK, NFKBIA, IL17A, TRAF6 |
| Peimine | MMP1, MMP3, MMP9, MMP13, NOS2, MAPK14, MAPK8, MAPK1, MAPK3, ACE2, AKT1, STAT6, IL1B, IL18, CASP1, NLRP3, RELA, TNF, IL6, CXCL8, IL17A, TFPI2, SERPINE1, VEGFA, CCL2, TGFB1, CASP3, BAX, BCL2, IL2, TLR4, MYD88, CHUK, NFKBIA, TRAF6 |
| Albiflorin | IRAK1, PRKAA2, IGF1, MAPK14, HMOX1, NOS2, TNF, LRP6, NLRP3, AKT1, PIK3R1, PRKAB1, AGER, IL1B, IL18, CCND1, BMP2, SMAD1, BCL2, MFN1, ICAM1, MFN2, BAX, RELA, MMP1, PRKAA1, IL6, CXCL8, RUNX2, CASP3, HMGB1, NFE2L2, PARP1 |
| Prunasin | PTGS2, DPP4, CDK2, ESR1, NOS2, HSP90AA1, COL1A1 |
| Glychionide A | BAX, CASP9, BCL2, BECN1, MAP1LC3B, SQSTM1 |
| Lithospermic acid | XDH, PRSS1, NOX4, SOD2, NQO1, CASP3, BAX, BCL2, NOS3, HMOX1, NFE2L2, KEAP1, PRKAA1, SQSTM1, MAP1LC3B, CTSD, AKT1, MTOR, CASP7, MMP9, MAPK1, MAPK3 |
| Shanzhiside methyl ester | DPP4, MMP9, TNF, CXCL8, MAPK14, IL18, NQO1, HMOX1, COL3A1, SOCS1, JAK2, STAT3, AKT1, PTGS2, FN1, SRC, EGFR, MAPK1 |
| Phenethyl ferulate | NOS2, ICAM1, VCAM1, HMOX1 |
| Tanshinone VI | VCAM1, MAPK1, TNFSF11, GCLM, ICAM1, MAPK3, RELA |
| 3,5,6,7,8,3',4'-Heptamethoxyflavone | MTOR, NOS2, TNF, SMAD7, IL10, MAPK1, ABCG1, SMAD3, IL1B, FOS, SREBF1, IL4, SCARB1, MAPK8, JUN, MAPK3, PPARG, CCL2, PRKCA, MMP1, IL6, CEBPA |
| 3-O-Feruloylquinic acid | MMP8, PTGS2, ESR1, DPP4, AR, PRSS1, NOS2, BCL2, STAT3, MTOR, MMP9 |
| Chrysin 6-C-glucoside 8-C-arabinoside | CALCA, TGFB1, TNF, MTHFR, SCN5A, TRPV1 |
| Luteolin 7-O-glucuronide | CCNA2, TNF, IL1B, MAPK1, NOS2, IL6, NQO1, HMOX1, GCLC, NFE2L2, MAPK14, MAPK8, NFKBIA |
| Chrysin-7-O-glucuronide | NOS2, LDHA, NOS1, F2, PTGS2, DPP4, PTGS1, ADRB2, ACHE, NOS3, PRSS1, CDK2 |
| 4-Hydroxyphenylacetic acid | TNF, PTGS2, IL1B, PTGS1, HIF1A, IL6 |
| Salicylic acid | PLG, EDN1, MAPK14, AOC3, TNF, CAT, ALOX5, FASN, MAPK1, PTGS2, NCF1, NFKB1, IL1B, SOD1, PON1, TERF1, PTGS1, SREBF1, IL4, APOA1, IFNB1, GAPDH, MAPK8, MAPK3, ACHE, PPARG, GUSB, RELA, GSTP1, PRKAA1, IL6, PRSS1, HEY1, CDK2, HMGB1 |
| Lobetyolin | CXCL10, MAPK14, CCL5, TP53, NOS2, TNF, CASP9, CDKN1A, IRF7, AKT1, IL10, MAPK1, PTGS2, DPP4, IL1B, C3, ESR1, NFKBIA, BCL2, CASP7, TGFB1, MAPK8, CXCL9, MYC, MAPK3, CASP8, BAX, GSK3B, HIF1A, RELA, IL6, CASP3, NFE2L2, MMP9, PARP1 |
| Salidroside | IL17A, MMP2, TLR4, MTOR, PPARGC1A, IRAK1, PRKAA2, MAPK14, WNT1, TP53, PGAM5, HMOX1, CYCS, CTSB, NOS2, TNF, IL33, MYD88, SMAD2, CASP9, MET, TRAF6, CDKN1A, NLRP3, MAP1LC3B, AKT1, JAK2, CHUK, IL10, STAT3, CASP1, MAPK1, ROCK2, LOXL2, PRKAB1, FOXP3, PIK3CG, PCK1, AGER, NFKB1, SIRT1, TIMP2, IL1B, BAD, SOD1, PIK3CA, IL2, DDIT3, GPX4, NFKBIA, BECN1, BCL2, FGF2, PIK3CB, VEGFA, PIK3CD, CDKN2A, SLC7A11, IL3, TGFB1, MAPK8, MFN2, CAV1, JUN, BCL2L1, MAPK3, NOTCH1, BAX, GSK3B, FOXO1, RHOA, CCL2, HIF1A, RELA, TXNIP, HGF, MAPT, PRKAA1, IL6, SRC, CASP3, HMGB1, NFE2L2, MMP9, PARP1, SIRT3 |
| 2-Pentanoylbenzoic acid | PTGS1, PTGS2, F2, NOS3 |
| Isoescin IA | PRKCB, GLI1, F2, PTGS2, F2RL1, JUN, BCL2L1, AR, TERT, PRKCA, PRKCD, MMP9, NR3C1 |
| Isoescin IB | PRKCB, GLI1, F2, PTGS2, F2RL1, JUN, BCL2L1, AR, TERT, PRKCA, PRKCD, MMP9, NR3C1 |
| Neoamygdalin | MMP7, MMP13, MMP8, LGALS3, HRAS, FGF2, HK2, VEGFA, MGMT, FGF1, MMP1, ADA, MMP12 |
| Cnidilide | MAPK14, NOS2, TNF, PTGS2, NFKB1, DPP4, IL1B, FOS, MAPK8, JUN, RELA, IL6, PARP1 |
| Ligustilide | ABCB1, SST, NOS2, PTGS2, PINK1, PRKAA1, TLR4, RELA, MYD88, TRAF6, SIRT1, AKT1, MTOR, CASP3, CASP8, CASP9, BAX, BCL2, TP53, MAPK1, MAPK3, MFN1, MFN2, VEGFA, NOS3, MAPK8, MAPK14, HIF1A, BECN1, ATG5, CTSD, HSPA5, DDIT3, EIF2AK3, MAP1LC3B, JUN, TGFB1, TRPA1, HMOX1, NFE2L2, EGFR, MMP2, PPARG, NFKBIA, CHUK, MMP3, HMGB1, CCL2, ICAM1, VCAM1, PTEN, IL4, IL10, STAT3, CCL22, ARG1, ESR1 |
| Praeruptorin A | MAPK14, HMOX1, NOS2, TNF, SMAD2, SMAD7, AKT1, MAPK1, SMAD3, PTGS2, NFKB1, DPP4, IL1B, ESR1, FOS, ABCA1, PTGS1, IL4, ADRB2, TGFB1, F10, MAPK3, AR, IL5, IL13, ACHE, PPARG, GSK3B, RELA, MMP1, IL6, SCN5A, PRSS1, CDK2 |
| Tanshinone IIA | IL17A, ECE1, MMP2, TLR4, AQP5, MTOR, EDN1, MAPK14, VCAM1, TP53, HMOX1, NOS2, TNF, MYD88, SMAD2, CDKN1A, RACK1, NLRP3, FASN, CYP1A2, AHSA1, AKT1, JAK2, IL10, STAT3, MAPK1, SMAD3, PTGS2, NFKB1, SIRT1, NQO1, DPP4, TIMP2, ITGB3, IL1B, NOX4, CHRM3, BAD, SOD1, IL2, ESR1, ACE2, NFKBIA, FOS, IL4, CHEK1, NR1I2, BCL2, ADRB2, VEGFA, TGFB1, MAPK8, EDNRA, MFN1, ICAM1, MFN2, MYC, CYP1A1, JUN, KEAP1, MAPK3, CCNA2, AR, CXCL1, ACHE, NOTCH1, BAX, PPARG, GSK3B, CCL2, HIF1A, RELA, STAT1, CYP3A4, NOS3, PRKAA1, IL6, SCN5A, MMP12, CFTR, SRC, CDK2, FN1, CASP3, HMGB1, NFE2L2, MMP9, AQP1 |
| Nobiletin | MMP2, TLR4, MTOR, PPARGC1A, CXCR4, CD163, MAPK14, VCAM1, TP53, HMOX1, MMP7, NOS2, TNF, MMP13, TLR9, RAF1, MYD88, CASP9, MMP3, BGLAP, PLA2G4A, CDKN1A, PPARA, FAP, NLRP3, JAK1, IRF7, CYP1A2, AKT1, NOS1, IL10, STAT3, MAPK1, SPP1, F2, SMAD3, PTGS2, CTNNB1, EGFR, SIRT1, NQO1, DPP4, IL1B, CCNE1, CCND1, FADD, BMP2, FAS, ESR1, CREB1, BMP4, GPX4, CDK4, ACE2, PTGS1, IL4, CHEK1, BCL2, HRAS, FOXO3, POR, TGFB1, MAPK8, F10, ICAM1, CYP1A1, JUN, MAPK3, CCNA2, TIMP1, CASP8, AR, CXCL1, NOTCH1, BAX, PPARG, GSK3B, HIF1A, RELA, MMP1, CYP3A4, NOS3, IL6, SCN5A, CXCL8, PRSS1, CDK2, RUNX2, CASP3, HMGB1, NFE2L2, MMP9, PARP1 |
| Butylphthalide | BDNF, NGF, NFE2L2, HMOX1, CASP3, TLR4, BAX, BCL2, RELA, MAPK8, GPX4, NOD2, NFKB1, SIRT1, HMGB1, IL4, IL13, FOXO3, MAPK14, IL6, TNF, IL1B, ATF2, MMP9, AKT1, IL2, VEGFA, HIF1A, CASP9, NLRP3, SOD1, TIMP1, CHUK, IKBKB, IL3, BNIP3, PRKAA1, MTOR, NQO1, FOXP3 |
| Praeruptorin E | NOS2, TNF, STAT3, MAPK1, F2, PTGS2, NFKB1, ESR1, NR1I2, F10, MAPK3, AR, RELA, CYP3A4, IL6, PRSS1 |
| Peimisine | NR3C1, ESR1, AR, IL6, IL1B, TNF, CCL2, JAK1, JAK2, STAT1, STAT3, NOS2, RELA |
| Dihydrobaicalin | PRSS1, GSK3B, CCNA2, F10 |

**Supplementary Table S4.** Top 20 targets obtained from component-target network.

| **Target name** | **Degree** | **Target name** | **Degree** |
| --- | --- | --- | --- |
| TNF | 30 | CASP3 | 22 |
| IL6 | 27 | BAX | 22 |
| RELA | 27 | MAPK8 | 21 |
| IL1B | 27 | PTGS2 | 21 |
| NOS2 | 27 | HMOX1 | 21 |
| MAPK1 | 26 | MMP9 | 20 |
| MAPK3 | 23 | NFE2L2 | 20 |
| BCL2 | 23 | TGFB1 | 18 |
| AKT1 | 23 | STAT3 | 17 |
| MAPK14 | 23 | TLR4 | 17 |

**Supplementary Table S5.** Top 15 nodes respectively determined by Degree and MCC algorithms.

| **Rank** | **Degree** | **MCC** |
| --- | --- | --- |
| 1 | TP53 | STAT3 |
| 2 | IL6 | IL6 |
| 3 | GAPDH | TNF |
| 4 | AKT1 | GAPDH |
| 5 | STAT3 | MMP9 |
| 6 | NFKB1 | AKT1 |
| 7 | JUN | NFKB1 |
| 8 | CASP3 | IL1B |
| 9 | TNF | TP53 |
| 10 | HIF1A | JUN |
| 11 | MMP9 | CASP3 |
| 12 | BCL2 | IFNG |
| 13 | IL1B | TGFB1 |
| 14 | TGFB1 | EGFR |
| 15 | CTNNB1 | BCL2 |

**Supplementary Table S6.** The information of 63 genes identified in both transcriptome sequencing and network pharmacology.

| 63 hub genes identified by overlapping transcriptome sequencing and network pharmacology | | | | | | |
| --- | --- | --- | --- | --- | --- | --- |
| FSTL1 | CCNE1 | SNAI1 | CTSK | KDR | TNFSF11 | CX3CR1 |
| IGF1 | CDK1 | CTSB | MYC | HMOX1 | CX3CL1 | TLR2 |
| NOS2 | ABCA1 | TNF | CCNA2 | PPARA | CFTR | CDKN2A |
| MMP13 | CYP1A1 | GDF2 | TIMP1 | FAP | HEY1 | TFPI2 |
| CCNB1 | FGF1 | IL23A | CCL2 | S100A4 | RUNX2 | MMP10 |
| NGF | MAPT | IRF7 | HSP90AA1 | IL10 | CXCL10 | AR |
| COL1A1 | CCL17 | SPP1 | COL3A1 | LOXL2 | SERPINE1 | TWIST1 |
| FOXP3 | FN1 | PTGS2 | CD163 | MMP14 | CHRM3 | COL1A2 |
| DPP4 | BNIP3 | ARG1 | CCL11 | PIK3CG | APOA1 | CYP1B1 |

**Supplementary Table S7.** Top 15 DEGs respectively determined by Degree and MCC algorithms.

| **Rank** | **Degree** | **MCC** |
| --- | --- | --- |
| 1 | TNF | TNF |
| 2 | CCL2 | CCL2 |
| 3 | FN1 | IGF1 |
| 4 | PTGS2 | FN1 |
| 5 | IL10 | PTGS2 |
| 6 | IGF1 | TIMP1 |
| 7 | TIMP1 | SPP1 |
| 8 | MYC | SERPINE1 |
| 9 | SERPINE1 | COL1A1 |
| 10 | SPP1 | MMP14 |
| 11 | TLR2 | MMP13 |
| 12 | CXCL10 | COL1A2 |
| 13 | COL1A1 | COL3A1 |
| 14 | HMOX1 | IL10 |
| 15 | HSP90AA1 | MYC |
